# Supplementary material
Source: HighWire-hosted journal article supplement (https://sti.bmj.com/content/94/6/449)
Supplement: inline-supplementary-material-6 [file inline-supplementary-material-6.pdf]

### Web Reference 6: Consistent condom use (other outcomes)

| Within group analysis                                   |                    |           |                      | Between group analysis at follow-up                     |                  |           |                      |          |
|---------------------------------------------------------|--------------------|-----------|----------------------|---------------------------------------------------------|------------------|-----------|----------------------|----------|
| Outcome                                                 | Intervention group |           | P value <sup>+</sup> | Outcome                                                 | Comparison group |           | P value <sup>+</sup> | P value* |
|                                                         | Baseline           | Follow-up |                      |                                                         | Baseline         | Follow-up |                      |          |
| <b><u>Consistent condom use</u></b>                     |                    |           |                      | <b><u>Consistent condom use</u></b>                     |                  |           |                      |          |
| Vaginal sex in the past month with:                     |                    |           |                      | Vaginal sex in the past month with:                     |                  |           |                      |          |
| Husband<br>(n= 26, baseline;<br>n=24, follow-up)        | 5 (19.2)           | 7 (29.2)  | 0.25                 | Husband<br>(n= 17, baseline;<br>n=17, follow-up)        | 3 (17.6)         | 3 (17.6)  | 1.00                 | 0.48     |
| Steady partner<br>(n= 46, baseline;<br>n=44, follow-up) | 14 (30.4)          | 16 (36.4) | 1.00                 | Steady partner<br>(n= 54, baseline;<br>n=54, follow-up) | 8 (14.8)         | 11 (20.4) | 0.25                 | 0.08     |
| Oral sex in the past month with:                        |                    |           |                      | Oral sex in the past month with:                        |                  |           |                      |          |
| Husband<br>(n= 14 baseline;<br>n=12, follow-up)         | 3 (21.4)           | 2 (16.7)  | 1.00                 | Husband<br>(n= 15, baseline;<br>n=15, follow-up)        | 2 (13.3)         | 2 (13.3)  | 1.00                 | 1.00     |
| Steady partner<br>(n= 28 baseline,<br>n=25, follow-up)  | 7 (25.0)           | 7 (28.0)  | 1.00                 | Steady partner<br>(n= 37, baseline;<br>n=38, follow-up) | 4 (10.8)         | 7 (18.4)  | 0.25                 | 0.37     |
| Anal sex in the past month with:                        |                    |           |                      | Anal sex in the past month with:                        |                  |           |                      |          |
| Paid partner<br>(n=33, baseline;<br>n=34, follow-up)    | 16 (48.5)          | 21 (61.8) | 0.29                 | Paid partner<br>(n=53, baseline;<br>n=53, follow-up)    | 25 (47.2)        | 27 (50.9) | 1.00                 | 0.32     |
| Casual partner<br>(n=28, baseline;<br>n=28, follow-up)  | 15 (53.6)          | 17 (60.7) | 0.73                 | Casual partner<br>(n=50, baseline;<br>n=50, follow-up)  | 24 (48.0)        | 25 (50.0) | 1.00                 | 0.36     |
| Husband<br>(n= 10 baseline;<br>n=10, follow-up)         | 4 (40.0)           | 4 (40.0)  | 1.00                 | Husband<br>(n= 7, baseline;<br>n=8, follow-up)          | 3 (42.9)         | 2 (25.0)  | 1.00                 | 0.64     |
| Steady partner<br>(n= 19 baseline,<br>n=20 follow-up)   | 5 (26.3)           | 6 (30.0)  | 1.00                 | Steady partner<br>(n= 23, baseline;<br>n=23, follow-up) | 6 (26.1)         | 6 (26.1)  | 1.00                 | 0.78     |

All figures in the table referred to frequency (percentage) unless otherwise indicated

“n” in the table refers to the number of participants who engaged in the specified sex with the specified partner

+The p-values were computed using McNemar test or McNemar Exact test (whichever appropriate); participants who were lost to follow-up were excluded from the paired analysis

\*The p-values were computed using  $\chi^2$  test or Fisher Exact test (whichever appropriate)
