# Supplementary material
Source: HighWire-hosted journal article supplement (https://sti.bmj.com/content/94/6/449)
Supplement: inline-supplementary-material-7 [file inline-supplementary-material-7.pdf]

**Web reference 7: Consistent condom negotiation behaviour and HIV knowledge  
(mediating factors)**

| Within group analysis                                     |                    |                   |          |                                                           |                  |                   |          | Between group analysis at follow-up<br>P value^ |
|-----------------------------------------------------------|--------------------|-------------------|----------|-----------------------------------------------------------|------------------|-------------------|----------|-------------------------------------------------|
| Mediating factor                                          | Intervention group |                   |          | Mediating factor                                          | Comparison group |                   |          |                                                 |
|                                                           | Baseline (n=147)   | Follow-up (n=147) | P value* |                                                           | Baseline (n=155) | Follow-up (n=155) | P value* |                                                 |
| <b><u>Consistent condom negotiation behaviour</u></b>     |                    |                   |          |                                                           |                  |                   |          |                                                 |
| Vaginal sex with the following partners in the past month |                    |                   |          |                                                           |                  |                   |          |                                                 |
| Paid partner<br>(n= 126, baseline;<br>n=128, follow-up)   | 56 (44.4)          | 95 (74.2)         | <0.001   | Paid partner<br>(n= 141, baseline;<br>n=139, follow-up)   | 61 (43.3)        | 57 (41.0)         | 0.69     | <0.001                                          |
| Casual partner<br>(n= 103, baseline;<br>n=97, follow-up)  | 43 (41.8)          | 64 (66.0)         | <0.001   | Casual partner<br>(n= 122, baseline;<br>n=121, follow-up) | 54 (44.3)        | 52 (43.0)         | 1.00     | 0.001                                           |
| Steady partner<br>(n= 46, baseline;<br>n=44, follow-up)   | 12 (26.1)          | 17 (38.6)         | 0.22     | Steady partner<br>(n= 54, baseline;<br>n=54, follow-up)   | 11 (20.4)        | 9 (16.7)          | 0.63     | 0.02                                            |
| Husband<br>(n= 26, baseline;<br>n=24, follow-up)          | 6 (23.1)           | 7 (29.2)          | 0.63     | Husband<br>(n= 17, baseline;<br>n=17, follow-up)          | 4 (23.5)         | 3 (17.6)          | 1.00     | 0.48                                            |
| Oral sex with the following partners in the past month    |                    |                   |          |                                                           |                  |                   |          |                                                 |
| Paid partner<br>(n= 74, baseline;<br>n=73, follow-up)     | 29 (39.2)          | 45 (61.6)         | <0.001   | Paid partner<br>(n= 101, baseline;<br>n=103, follow-up)   | 40 (39.6)        | 39 (37.9)         | 1.00     | 0.002                                           |
| Casual partner<br>(n= 69, baseline;<br>n=65, follow-up)   | 28 (40.6)          | 36 (55.4)         | 0.02     | Casual partner<br>(n= 88, baseline;<br>n= 92, follow-up)  | 34 (38.6)        | 36 (39.1)         | 1.00     | 0.04                                            |
| Steady partner<br>(n= 28, baseline;<br>n=25, follow-up)   | 4 (14.3)           | 7 (28.0)          | 0.13     | Steady partner<br>(n= 37, baseline;<br>n=38, follow-up)   | 4 (10.8)         | 5 (13.2)          | 1.00     | 0.43                                            |
| Husband<br>(n= 14, baseline;<br>n=12, follow-up)          | 4 (28.6)           | 3 (25.0)          | 1.00     | Husband<br>(n= 15, baseline;<br>n=15, follow-up)          | 2 (13.3)         | 2 (13.3)          | 1.00     | 0.63                                            |
| Anal sex with the following partners in the past month    |                    |                   |          |                                                           |                  |                   |          |                                                 |
| Paid partner<br>(n= 33, baseline;<br>n=34, follow-up)     | 14 (42.4)          | 21 (61.8)         | 0.07     | Paid partner<br>(n= 53, baseline;<br>n=53, follow-up)     | 28 (52.8)        | 27 (50.9)         | 0.63     | 0.32                                            |
| Casual partner<br>(n= 28, baseline;<br>n=28, follow-up)   | 12 (42.9)          | 16 (57.1)         | 0.22     | Casual partner<br>(n= 50, baseline;<br>n=50, follow-up)   | 25 (50.0)        | 26 (52.0)         | 1.00     | 0.66                                            |
| Steady partner<br>(n= 19, baseline;<br>n=20, follow-up)   | 4 (21.1)           | 7 (35.0)          | 0.50     | Steady partner<br>(n= 23, baseline;<br>n=23, follow-up)   | 7 (30.4)         | 7 (30.4)          | 1.00     | 0.75                                            |

| Within group analysis                                                                    |                  |                   |          |                                                                                          |                  |                   |          | Between group analysis at follow-up |
|------------------------------------------------------------------------------------------|------------------|-------------------|----------|------------------------------------------------------------------------------------------|------------------|-------------------|----------|-------------------------------------|
| Intervention group                                                                       |                  |                   |          | Comparison group                                                                         |                  |                   |          |                                     |
| Mediating factor                                                                         | Baseline (n=147) | Follow-up (n=147) | P value* | Mediating factor                                                                         | Baseline (n=155) | Follow-up (n=155) | P value* | P value^                            |
| Husband<br>(n= 10, baseline;<br>n=10, follow-up)                                         | 3 (30.0)         | 3 (30.0)          | 1.00     | Husband<br>(n= 7, baseline;<br>n=8, follow-up)                                           | 3 (42.9)         | 2 (25.0)          | 1.00     | 1.00                                |
| <b><u>HIV knowledge</u></b>                                                              |                  |                   |          | <b><u>HIV knowledge</u></b>                                                              |                  |                   |          |                                     |
| HIV-KQ-18<br>knowledge score,<br>median (IQR)<br>(n= 147, baseline;<br>n=147, follow-up) | 8 (5 – 11)       | 10 (7 – 14)       | <0.001   | HIV-KQ-18<br>knowledge score,<br>median (IQR)<br>(n= 155, baseline;<br>n=155, follow-up) | 7 (5 – 11)       | 8 (5 – 10)        | 0.24     | <0.001                              |

All figures in the table referred to frequency (percentage) unless otherwise indicated

"n" in the table refers to the number of participants who engaged in the specified sex with the specified partner

\*The p-values were computed using McNemar test or McNemar Exact test (whichever appropriate) for categorical variables and Wilcoxon Signed-Rank Test for ordinal variables; participants who were lost to follow-up were excluded from the paired analysis.

^The p-values were computed using  $\chi^2$  test or Fisher Exact test (whichever appropriate) for categorical variables and Wilcoxon Rank Sum test for ordinal variables
