# Supplementary material
Source: HighWire-hosted journal article supplement (https://sti.bmj.com/content/94/6/449)
Supplement: inline-supplementary-material-8 [file inline-supplementary-material-8.pdf]

### Web Reference 8: Successful condom negotiation behaviour (mediating factors)

| Partner type                               | Proportion of success in condom negotiation* |              |                  |              |
|--------------------------------------------|----------------------------------------------|--------------|------------------|--------------|
|                                            | Intervention group                           |              | Comparison group |              |
|                                            | Baseline                                     | Follow-up    | Baseline         | Follow-up    |
| <b>Vaginal sex in the past month with:</b> |                                              |              |                  |              |
| Paid partner                               | 37/56 (66.1)                                 | 90/95 (94.7) | 37/61 (60.7)     | 37/57 (64.9) |
| Casual partner                             | 30/43 (69.8)                                 | 61/64 (95.3) | 37/54 (68.5)     | 37/52 (71.2) |
| Husband                                    | 3/6 (50.0)                                   | 4/7 (57.1)   | 1/4 (25.0)       | 1/3 (33.3)   |
| Steady partner                             | 6/12 (50.0)                                  | 9/17 (52.9)  | 4/11 (36.4)      | 4/9 (44.4)   |
| <b>Oral sex in the past month with:</b>    |                                              |              |                  |              |
| Paid partner                               | 14/29 (48.3)                                 | 35/45 (77.8) | 18/40 (45.0)     | 19/39 (48.7) |
| Casual partner                             | 15/28 (53.6)                                 | 30/36 (83.3) | 18/34 (52.9)     | 20/36 (55.6) |
| Husband                                    | 2/4 (50.0)                                   | 1/3 (33.3)   | 1/2 (50.0)       | 1/2 (50.0)   |
| Steady partner                             | 2/4 (50.0)                                   | 4/7 (57.1)   | 2/4 (50.0)       | 2/5 (40.0)   |
| <b>Anal sex in the past month with:</b>    |                                              |              |                  |              |
| Paid partner                               | 8/14 (57.1)                                  | 14/21 (66.7) | 15/28 (53.6)     | 17/27 (63.0) |
| Casual partner                             | 6/12 (50.0)                                  | 11/16 (68.8) | 16/25 (64.0)     | 17/26 (65.4) |
| Husband                                    | 1/3 (33.3)                                   | 1/3 (33.3)   | 1/3 (33.3)       | 1/2 (50.0)   |
| Steady partner                             | 2/4 (50.0)                                   | 4/7 (57.1)   | 3/7 (42.9)       | 3/7 (42.9)   |

All figures in the table referred to frequency (percentage) unless otherwise indicated

\* The denominator value refers to the number who always negotiated for condom use and the numerator value refers to the number who always agreed to use condom
