# Supplementary material
Source: HighWire-hosted journal article supplement (https://sti.bmj.com/content/94/6/449)

## Web Reference 2: Recruitment process of the female entertainment workers

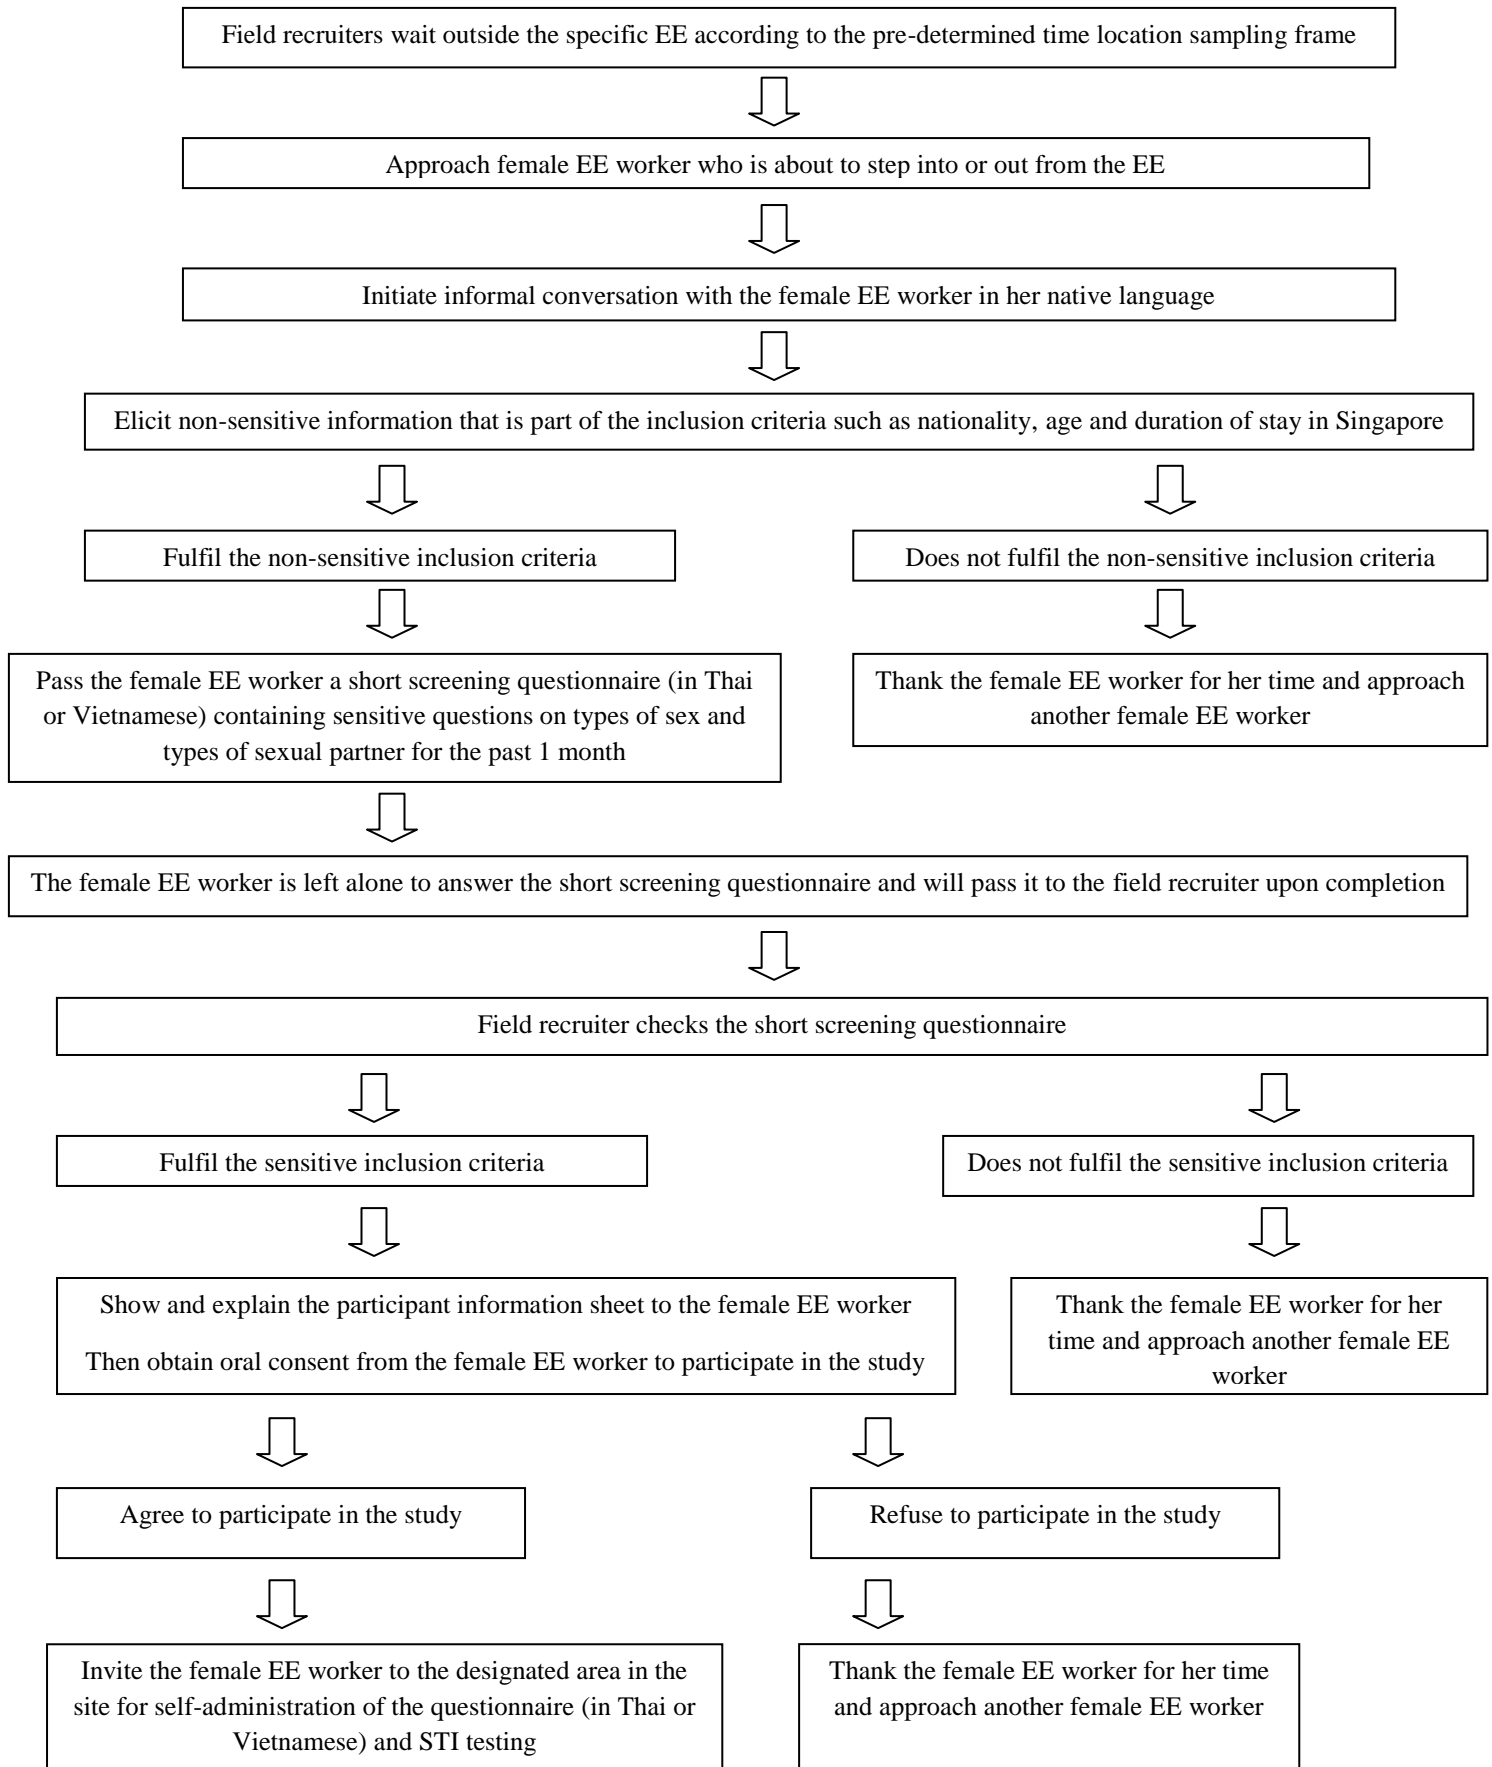

Supplement: inline-supplementary-material-2 [file inline-supplementary-material-2.pdf]
